# Supplementary material
Source: PubMed Central journal article supplement (PMC2781555)
Supplement: supp_M109.035568_jbc.M109.035568-1.pdf [file supp_M109.035568_jbc.M109.035568-1.pdf]

SUPPLEMENTARY DATA

**TABLE 1. Clinical characteristics for subjects in TBC1D1 protein expression analysis in skeletal muscle.**

| n                                                             | Control |   |      | Type 2 Diabetic |   |       |
|---------------------------------------------------------------|---------|---|------|-----------------|---|-------|
|                                                               | 10      |   |      | 8               |   |       |
| Age (years)                                                   | 55.7    | ± | 2.0  | 58.1            | ± | 1.7   |
| BMI (kg/m <sup>2</sup> )                                      | 26.9    | ± | 0.8  | 27.6            | ± | 1.3   |
| Body fat (%)                                                  | 26.6    | ± | 1.6  | 24.6            | ± | 2.3   |
| VO <sub>2</sub> max (ml·kg <sup>-1</sup> ·min <sup>-1</sup> ) | 32.1    | ± | 2.1  | 29.2            | ± | 1.8   |
| Fasting glucose (mM)                                          | 5.1     | ± | 0.3  | 8.9             | ± | 0.9 * |
| Fasting insulin (pM)                                          | 50      | ± | 7    | 97              | ± | 27    |
| FFA (mM)                                                      | 675     | ± | 151  | 787             | ± | 84    |
| Serum triglycerides (mM)                                      | 1.29    | ± | 0.18 | 1.38            | ± | 0.17  |
| Serum cholesterol (mM)                                        | 5.07    | ± | 0.22 | 4.74            | ± | 0.28  |
| HDL cholesterol (mM)                                          | 1.29    | ± | 0.07 | 1.15            | ± | 0.11  |
| LDL cholesterol (mM)                                          | 3.24    | ± | 0.20 | 2.96            | ± | 0.29  |
| HbA1c                                                         | 4.5     | ± | 0.1  | 7.0             | ± | 0.4 † |
| Glucose utilization (mM·kg <sup>-1</sup> ·min <sup>-1</sup> ) | 36.0    | ± | 3.3  | 25.8            | ± | 5.2   |
| Duration of diabetes (years)                                  |         |   |      | 6.43            | ± | 1.94  |

\*P < 0.005 vs control subjects; †P < 0.001 vs control subjects.
